# Supplementary material for: Perspectives of Nurses Toward Telehealth Efficacy and Quality of Health Care: Pilot Study
Source: PubMed Central journal article supplement (PMC5993972; doi:10.2196/medinform.9080), 2018-05-25
Supplement: medinform_v6i2e35_app2.pdf [file medinform_v6i2e35_app2.pdf]

*Multimedia Appendix B: Responses to the open ended questions:*

Table A: Response to open ended question “How did telehealth change the way you work?”.

| Respondent | Responses                                                                                                              | Dimension Mapping |
|------------|------------------------------------------------------------------------------------------------------------------------|-------------------|
| 1          | Scheduling and follow up visits, patient teaching tool                                                                 | Tangibles         |
| 2          | Allowed us to incorporate a new resource into what is offered in our care - and highlighted the benefits of technology | Tangibles         |
| 3          | Able to monitor patients even on days a nurse is not visiting them                                                     | Tangibles         |
| 4          | Aids in teaching clients personal health habits                                                                        | Empathy           |
| 5          | The change in practice has improved keeping patients out of the hospital.                                              | Tangibles         |
| 6          | Assists with monitoring vs and weight on non-nursing visit days                                                        | Reliability       |
| 7          | Phone contacts and assessments can be just as valid as in person visits when you listen and ask the right questions    | Responsiveness    |

Table B: Response to open-ended question “What do you like most about telehealth?”

| Respondent | Responses                                                                                      | Dimension Mapping |
|------------|------------------------------------------------------------------------------------------------|-------------------|
| 1          | The security it gives my patients, ability to monitor them on days I do not visit them.        | Reliability       |
| 2          | Convenience                                                                                    | Tangibles         |
| 3          | Ability to see how a patient is doing every day, despite when visits are scheduled to the home | Reliability       |
| 4          | We are able to check on patients every day.                                                    | Reliability       |
| 5          | Immediate review of information                                                                | Responsiveness    |
| 6          | Ability to watch patients on a daily basis.                                                    | Reliability       |
| 7          | Daily records                                                                                  | Reliability       |
| 8          | Ability to see how patients are doing daily not just at appointments                           | Reliability       |

Table C: Response to open-ended question “What do you like least about telehealth?”

| Respondent | Responses                                                                                             | Dimension Mapping |
|------------|-------------------------------------------------------------------------------------------------------|-------------------|
| 1          | Time consuming to look up history of VS, weights for those patients that do not manually record       | Tangibles         |
| 2          | Equipment malfunction                                                                                 | Tangibles         |
| 3          | Technology can become obsolete and cost to replace or update can be quite high                        | Tangibles         |
| 4          | I do not like when the monitors do not function properly                                              | Tangibles         |
| 5          | When it does not work                                                                                 | Tangibles         |
| 6          | The older equipment (not the IA monitors) are not easily set up and/or as reliable as the IA monitors | Tangibles         |
| 7          | Nothing at this point                                                                                 | Tangibles         |

|   |                                                                                           |           |
|---|-------------------------------------------------------------------------------------------|-----------|
| 8 | Inconsistency with equipment                                                              | Tangibles |
| 9 | When staff or patients question the results when I know equipment is reliable and tested. | Empathy   |
